# Supplementary material for: An Outcomes-Based Framework for Integrating Academics With Student Life to Promote the Development of Undergraduate Students’ Non-cognitive Skills
Source: Frontiers journal article supplement (doi:10.3389/feduc.2022.782214), 2022-03-03
Supplement: Table_1.DOCX [file Table_1.DOCX]

**Supplementary Table 1.** Here we provide more detail on key aspects of Minerva University’s model that were not elaborated on in the main text: a strong commitment to active learning, the use of custom proprietary technology to facilitate learning, and a global experience, manifest in the diversity of the student population and rotation through seven global cities over four years.

| **Aspect** | **Rationale and Implementation** |
| --- | --- |
| **Active Learning** | Minerva’s pedagogical model is focused on enhancing student learning. All classes are small (rarely more than 18 students), active-learning seminars using a flipped-classroom approach in which students receive preparatory readings and work prior to each class, and they’re expected to be able to apply this material during the class. The classes never include lectures. Each class involves a diversity of activities, including polls, discussion, and breakouts. Lesson plans are designed such that each student is actively engaging for most of each 90-minute session. Professors employ techniques such as cold calling and encouraging students to respond to each other in order to maximize attention and engagement. |
| **Custom Proprietary Technology** | Minerva’s Forum platform was designed specifically to facilitate active learning. While many colleges have recently shifted to online instruction in response to the ongoing pandemic, Minerva’s decision to utilize remote learning was based on pedagogical considerations. The intention is for the remote experience not to be a watered-down version of the in-person classroom experience, but to use the technology to enhance the learning experience. One of the design ideas was not only to provide each student with the experience of a small seminar, but to provide them with the experience of being in the seat right next to the professor. All students are visible on screen at all times, and students rotate through being featured on the “main stage” during the class sessions. Forum is integrated with document, spreadsheet, whiteboard, polling, and coding tools, so it is possible to collaboratively work on computer code, edit student work products, or annotate resources in class or in the small breakout groups. No class time is lost transitioning to or from group work, and each breakout group can be immediately supplied with custom resources that they can start working on. Forum also has various tools (chat, emoji, hand raises) to facilitate non-verbal responses from students, and a tool to track student talk time, to help professors to identify students who need to be brought into the conversation. |
| **Global Experience** | One of Minerva’s goals is to provide students with a genuine global experience, and to forge a community of global citizens. Although classroom instruction takes place in a virtual environment, Minerva is a residential program, where students live together in seven global locations during the course of their four years of study. Minerva students are from 80 different countries, only 12% of undergraduate students are American.  During their first semester, students are based in San Francisco. Over the following six semesters, they relocate to six additional cities: Taipei, Seoul, Hyderabad, Berlin, Buenos Aires, and London. The global rotation offers unique opportunities for cross-contextual integration between academics, culture, and personal growth, as explained in the section above. |

**Supplementary Table 2.** Core Learning Outcomes. This is the list of the shorthand hashtags of the nearly eighty core learning outcomes, sorted by the four core competencies (thinking critically, thinking creatively, communicating effectively, and interacting effectively) and sub-competencies. These skills are introduced to students in the first year and reinforced in the following years through their academic coursework, practical projects, and university programming, as is discussed in-depth in the course of this paper.

| ***Thinking Critically*** | | ***Thinking Creatively*** |
| --- | --- | --- |
| **Analyzing data** | **Analyzing decisions** | **Applying research methods** |
| #descriptivestats | #psychologicalexplanation | #observationalstudy |
| #probability | #purpose | #interventionalstudy |
| #distributions | #utility | #casestudy |
| #confidenceintervals | #biasidentification | #interviewsurvey |
| #correlation | #biasmitigation | #studyreplication |
| #regression | #expectedutility | #controlgroups |
| #significance | #decisiontrees | #sampling |
| **Evaluating justifications** | **Analyzing problems** | **Solving problems** |
| #evidencebased | #rightproblem | #scienceoflearning |
| #sourcequality | #breakitdown | #analogies |
| #deduction | #gapanalysis | #constraints |
| #induction | #variables | #heuristics |
| #fallacies | #gametheory | #algorithms |
|  |  | #optimization |
|  |  | #designthinking |
| **Evaluating claims** | | **Facilitating discovery** |
| #interpretivelens | #plausibility | #hypothesisdevelopment |
| #context | #testability | #dataviz |
| #critique | #estimation | #modeling |

| ***Communicating Effectively*** | ***Interacting Effectively*** | |
| --- | --- | --- |
| **Using language** | **Interacting with complex systems** | **Negotiating and persuading** |
| #professionalism | #multipleagents | #negotiate |
| #thesis | #levelsofanalysis | #nudge |
| #organization | #emergentproperties | #carrotandstick |
| #composition | #multiplecauses | #cognitivepersuasion |
| #connotation | #networks | #emotionalpersuasion |
| #audience | #systemdynamics | #confidence |
| **Using nonverbal communication** | **Working with others** | **Resolving ethical problems** |
| #medium | #leadprinciples | #ethicalframing |
| #expression | #powerdynamics | #ethicalconflicts |
| #communicationdesign | #strategize |  |
| #multimedia | #differences |  |
|  | #conformity |  |
|  | #selfawareness |  |
|  | #emotionaliq |  |
|  | #responsibility |  |

**Supplementary Table 3.** General Learning Outcome Rubric. Each Integrated Learning Outcome (ILO) incorporates relevant foundational LOs.

| Interpersonal Engagement (IE) | Intercultural Competency (IC) | Professional Development (PD) | Self-Management and Wellness (SMW) | Civic Responsibility (CR) |
| --- | --- | --- | --- | --- |
| #selfawarness  #emotionalIQ  #audience  #expression  #confidence  #leaedprinciples  #differences  #conformity  #biasidentification  #biasmitigation | #interpretivelens  #biasidentification  #biasmitigation  #connotation  #differences  #induction  #fallacies | #professionalism  #purpose  #utility  #negotiate  #powerdynamics  #audience  #responsibility  #selfawarness  #breakitdown  #rightproblem | #selfawarness  #emotionalIQ  #constraints  #utility  #emergentproperties  #estimation | #levelsofanalysis  #conformity  #expression  #emergentproperties  #rightproblem  #purpose  #systemmapping  #complexcausality |

**Supplementary Table 4.** General Learning outcome rubric. The table below is a general template that is used to assess students' proficiency in any of the Learning Outcomes specified in Supplementary Material 2, by determining the expectations and requirements for each grade level in an objective and clear way. Using this template, there is a specific rubric defined for each LO, and examples of this are provided in the main text for two LOs (Tables 1 and 2, #selfawareness and #biasmitigation).

| ***Learning Outcome Rubric Template*** | |
| --- | --- |
| 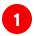 | (Lacks knowledge) Does not recall or use the skill or concept when prompted or does so mostly or entirely inaccurately. |
| 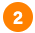 | (Superficial knowledge) Recalls or uses the skill or concept only somewhat accurately or uses the skill or concept in a way that fails to address the relevant problems or goals. |
| 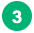 | (Knowledge) Accurately or effectively uses the skill or concept in a way that addresses the relevant problems or goals. |
| 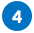 | (Deep knowledge) Accurately or effectively uses the skill or concept in a way that addresses the relevant problems or goals and demonstrates a deep grasp of the skill or concept by analyzing, explaining, or justifying the application in a way appropriate to the given context. |
| 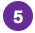 | (Profound knowledge) Uses the skill or concept in a creative and effective way, relying on a novel perspective. |

**Supplementary Table 5.** ILO Self-Evaluation Template. The following is a self-evaluation form for students to self-reflect on their current skills and abilities within each ILO. This self-evaluation will be completed at the beginning of students’ Minerva experience, then at the end of each academic year thereafter.

**Prompt:** Using the scale below, select the stage of development you believe you are currently in, for each of the elements of the ILO.

| **Beginning** | **Emerging** | **Advancing** | **Accomplished** | **Exemplary** |
| --- | --- | --- | --- | --- |
| **I do not currently exhibit this element of the ILO, or I am only becoming aware of the importance of this element.** | **I am aware of the value of this element of the ILO, and am starting to engage with this element and practice the relevant skills, even if it still feels unfamiliar to me.** | **I am actively reflecting and working on this element of the ILO, and exhibit some level of skill and familiarity with the element.** | **I can demonstrate this element of the ILO consistently and effectively in general, though I may need to be planful and practice it in preparation for new contexts.** | **I am highly effective in this element, such that it is considered one of my top strengths that I can offer to others. I can easily re-adjust its application in new contexts without much effort.** |

| ILO | Element | Beginning | Emerging | Advancing | Accomplished | Exemplary |
| --- | --- | --- | --- | --- | --- | --- |
| Self-Management & Wellness  (8 elements) | Managing stress and emotions well. |  |  |  |  |  |
| Fulfilling responsibilities. |  |  |  |  |  |
| Comfortable with who you are. |  |  |  |  |  |
| Enjoying life and your activities. |  |  |  |  |  |
| Taking good care of your body and health. |  |  |  |  |  |
| ILO: Interpersonal Engagement  (7 elements) | Listening actively, and working intentionally to have empathy and take other perspectives |  |  |  |  |  |
| Making an effort to consider my role in each situation when I am communicating |  |  |  |  |  |
| In conflict, looking for ways for all parties to feel satisfied with an outcome |  |  |  |  |  |
| Intentionally looking to balancing one’s own needs with the needs of others’ |  |  |  |  |  |
| Intercultural Competency  (7 elements) | Continuously exploring one’s cultural identity with openness |  |  |  |  |  |
| Approaching cultural differences with curiosity, humility, respect |  |  |  |  |  |
| Engaging with new cultural contexts authentically and deeply |  |  |  |  |  |
| Adapting to new cultures and environments readily |  |  |  |  |  |
| Building meaningful cross-cultural relationships |  |  |  |  |  |
| Effectively managing difficult emotions related to challenging intercultural interactions and expansion of one’s limitations |  |  |  |  |  |
| Professional Development  (9 Elements) | Adopting belief and practice of growth mindset and adjusting to accomplish goals |  |  |  |  |  |
| Understanding and articulating one’s interests, values, strengths, skills, and motivations in professional settings |  |  |  |  |  |
| Identifying knowledge, skills and experiences needed in career fields and jobs of interest to inform |  |  |  |  |  |
| Taking responsibility for one's own professional development by developing and making progress on action plans based on their understanding of how to prepare to succeed in their professional pursuits. |  |  |  |  |  |
| Thinking and acting strategically and long term about one’s professional future, drawing connections between both academic and non-academic experiences to future goals. |  |  |  |  |  |
| Understanding and adopting professional norms/etiquette in different cultural contexts |  |  |  |  |  |
| Presenting ideas and information effectively in professional settings |  |  |  |  |  |
| Developing one’s network and authentically engaging with it to benefit one’s career and profession |  |  |  |  |  |
| Civic Responsibility  (6 elements) | Recognizing interrelatedness of one’s action/inaction on local communities, informed decisions |  |  |  |  |  |
| Leaving res halls and surrounding neighbourhood better than upon arrival, e.g. reduce waste |  |  |  |  |  |
| Being informed about local politics and civic issues |  |  |  |  |  |
| Participating in local community and open forums |  |  |  |  |  |
| Pursuing challenges that improve lives of others |  |  |  |  |  |
| Being accountable within Minerva community |  |  |  |  |  |

**Supplementary Material 6**

*Personal Development Plan (Abbreviated Version)*

 Below is an excerpt of the Personal Development Plan Assignment that students are given to complete as part of the Integrated Learning Course. Throughout the assignment, students are prompted to select a learning outcome to focus on, reflect on how to leverage their strengths and mitigate weaknesses, and create an actionable plan to improve.

| **Personal Development Plan Overview:**  Your Personal Development Plan (PDP) is a resource that can help you set goals, including those around integrated learning, during your academic year at Minerva. It is expected that you will develop a new PDP at the beginning of every semester and pursue your goal(s) during that semester. Each semester, we encourage you to choose different Integrated Learning Outcomes and develop goals related to these areas. |
| --- |
| **Understanding Your Hopes and Dreams:** Before you set specific goals related to the Integrated Learning Outcomes (ILOs), take a few moments to reflect and imagine your upcoming year at Minerva. Broadly speaking, what are some of your hopes and dreams for the year ahead? What do you hope this year looks and feels like? How would you like to grow?   |  | | --- | |
| **Which Learning Outcome would you like to make progress toward this semester?**  **What behavior/mindset or skill within this LO do you want to grow in and set a goal for this semester?**   | *For example, you might have identified that you are good at maintaining an exercise schedule, but that you want to develop more self-discipline in following through on your PD goals, such as building your online portfolio.* | | --- | |
| **What motivates you to select this goal? What will change in your life if you are able to make progress in this area?**   |  | | --- | |
| **Setting Goals Using the Stages of Change Rubric**   | **Growing Awareness** | **Emerging Practice** | **Consistent Practice** | **Frequent**  **Practice** | **Proficient Practice** | | --- | --- | --- | --- | --- | | *You notice that you have current habits or mindsets that no longer serve you well, and that developing new behaviors may be important.* | *You begin to set goals for new behaviors or mindsets and start your practice. Most of the time, you default back to your old habits.* | *You are consistently practicing your new behavior or mindset, and actively adjusting the behavior to suit your needs. You may still default back to your previous behavior sometimes.* | *You are able to practice the new behavior or mindset most of the time, despite some infrequent setbacks.* | *Your “new” behavior has become your “default” behavior or mindset! When you do not practice the new habit, it is usually an intentional choice.* | |  | |
| ***Based on the stages above and your target behavior/mindset/skill, please answer the following questions:***  What would it look like to reach Proficient Practice? Describe what it would look like for you to be in that stage.   | *An IC example: When I’m in Proficient Practice, I will cultivate deeper friendships with people from very different cultural backgrounds and take the time to understand how our cultural backgrounds might influence our worldviews. I will be able to identify more nuance in cultural dynamics between myself and locals, including when or to what degree it may be appropriate to adjust my own behaviors, while also feeling comfortable in “being myself.” I’d also love to spend time reading the local news and understanding the history of places I visit and spend time.* | | --- | |
| Take a moment to reflect on your current developmental stage. Which stage do you hope to be in by the end of this semester?   |  | | --- | |
| In the box below, please write down one SMART goal you will commit to this semester to reach that desired stage.  Remember that SMART stands for **S**pecific **M**easurable **A**ttainable **R**elevant and **T**imebound.   | E*xample: I would like to reach Consistent Practice by the end of the semester. This would mean I read the local news ~5 days a week, attend events in the city mostly on my own or in small groups once every 1-2 weeks. I will know I am making progress when I can identify a few examples of how my own cultural lens may compare to local perspectives, including potential biases, values, traditions, and preferences.* | | --- | |
| **Seeking Alignment:**  *How do your goals align with your overall hopes and dreams for the year?* Share one or two reflections.   |  | | --- | |
| *Which other Learning Outcomes will you apply to help you achieve your goals?*   |  | | --- | |
| *Are there any other goals you’d like to set for yourself this semester?*   |  | | --- | |
| **Motivation & Support**  We all get in the way of our own success. What are your top three typical barriers? Place an X next to each.   |  | Procrastination |  | Wanting to be right | | --- | --- | --- | --- | |  | Wanting to control life/people |  | Wanting to be perfect | |  | Being afraid of making a mistake |  | Getting distracted by secondary goals | |  | Being indecisive |  | Not delegating | |  | Not saying “Yes” or holding back |  | Not acknowledging the whole truth | |  | Not proactively seeking opportunities |  | Taking on too much (Not saying “No”) | |  | Other (Explain): | | | |
| *Finally, what are the most important factors for you when you making decisions? (e.g., what are your values/operating principles?) Naming and understanding your core values can keep you on track as you pursue the hopes and dreams you described above.* |

**Supplementary Material 7**

*Ethnographic Assignment (Abbreviated Version)*

 Below is an excerpt of the instructions which are given to students for the Ethnographic Assignment, part of the Integrated Learning Course.

| **Overview for full Project**    You will observe, interview, research, and write up an investigation of a member (*classmate*) of a cultural group previously unfamiliar to you. For this assignment, we will call this individual your “*Cultural Informant*.” You will need to meet with your informant several times over the semester to carry this assignment out. |
| --- |
| **Step 1: Identifying and Interviewing Your Cultural Informant**    **A) Please take some time to learn about your Informant’s cultural unfamiliarity.**    Then include the following from your interview:   - Your informant; please provide their name, - A description of their cultural unfamiliarity (country, or other cultural difference described in note on cultural unfamiliarity), - How you established rapport, - A brief summary of your informant’s background/biography, - Bibliography of sources you used to learn about your informant's cultural unfamiliarity.     **B) Tips for your interview:**   - Listen closely and restate what informants say, using their language. - Don’t ask for meaning, ask for use. “Why” questions and asking people to explain what they mean should be avoided because this may pressure people, convey an evaluative judgment, and result in defensiveness. Rely more upon, “what”, “when”, “where” and “how” questions. - Express both verbal and nonverbal interest in what informants say. If they feel you are only doing this to get a grade or because you look down on their beliefs or customs, they will not make an effort to help you learn. - Express cultural ignorance. “I didn’t know that. I never thought of that.” - Encourage informants to expand rather than abbreviate what they say, to go into greater rather than less detail. Ask follow-on questions when there seems to be more that could be shared. Don’t assume that you understand what they mean. - Incorporate the informant’s terms to show that you are learning and to verify their meaning. - Ask friendly questions – don’t act like a journalist who just wants a story. - Thank them when you take your leave: “I’ve really learned a lot today.”     **C) Assignment Requirements:**  Write up what you learned from your Informant using the above processes. Your paper should be a typed, double-spaced report of 500-1000 words. |
| **Step 2: Reflection**   - Using the questions below, reflect on what you’ve learned to date from your interactions over the semester. - What did you learn about yourself and your own cultural preferences (*your history, rules, values, biases, politics, communication styles, economy, or beliefs and practices*) through this experience? - Were you able to interpret/understand situations/experiences from your own and your informant(s)’ cultural point of view? - Did you adapt your communication style (*either in using their language or non-verbal communication patterns*) in order to facilitate communication with your informant(s)’? - How did you learn about your informant’(s)’ culture (*their history, rules, values, biases, politics, communication styles, economy, or beliefs and practices*)? What types of questions or processes did you use? - How did you manage your judgments about your informant(s)’ cultural background, (*their history, rules, values, biases, politics, communication styles, economy, or beliefs and practices*)?     This final concluding section should be ~400-500 words. Please note that in the conclusion you need to address what it has meant for you to enter into these interactions with your Informant.  There will be multiple ***“I”*** statements here: ***What has changed for you in terms of general notions of intercultural engagement? Has your knowledge of yourself shifted in any way? What has been powerful/positive about this activity? What has been difficult/problematic about this activity?*** |

**Supplementary Table 8.**

Additional Information for Figure 1

| **Cohort** | **Academic Year** | **Number of Students at the Start of the Academic Year** | **Score Count for #selfawareness** |
| --- | --- | --- | --- |
| Class of 2020 | 2016-2017 | 160 | 308 |
| 2017-2018 | 153 | 15 |
| 2018-2019 | 150 | 121 |
| 2019-2020 | 146 | 127 |
| Class of  2021 | 2017-2018 | 198 | 519 |
| 2018-2019 | 187 | 142 |
| 2019-2020 | 177 | 139 |
| 2020-2021 | 180 | 121 |
